# Supplementary material for: Rejection mechanisms for color singleton distractors operating on different time scales
Source: Research Square preprint supplement (doi:10.21203/rs.3.rs-6838174/v1), 2025-06-17
Supplement: Supplementary file 1 [file 40a9123f368689c6989437cb.docx]

**Supplementary Information for the manuscript:**

**“Rejection mechanisms for color singleton distractors operating on different time scales”**

For all experiments we report the same analyses as in the manuscript, with the difference that here, after removing incorrect responses, we excluded RT outliers with a procedure based on linear mixed-effect models using *lmerTest* (Kuznetsova et al., 2017) as they are well suited for unbalanced designs and accounting for individual variability (Barr et al., 2013). Outliers were defined as data points exceeding 2.5 standard deviations from the predicted values, for each participant and condition and amounted to 3% of all the data. The patterns of results are the same, except in Experiment 2, where a difference was found between the RTs in the low-probability condition and both the high-probability and the distractor-absent conditions, whereas in the manuscript, where this outlier exclusion procedure was not applied, there was no difference between the three conditions. However, this does not impact our interpretation of the results.

**Experiment 1**

*Attentional capture*

An ANOVA was performed on RTs with the factor distractor condition (absent,

repeated or single), which was significant, *F*(2, 58) = 19.86, *p* < .001 , 𝜂𝑝 2 = .4. Post-hoc

comparisons (which were subject to Holm correction here and in the following

experiments) showed that in the single condition (*M* = 1238; *SD* = 93), participants

were significantly slower than in both the repeated condition (*M* = 1213; *SD* = 88), *t*(29)

= -3.50, *p* = .002, *d* = 0.6, and the distractor-absent condition (*M* = 1198; *SD* = 83), *t*(29)

= 6.69, *p* < .001, *d* = 1.2. The RT difference between the repeated condition and the

distractor-absent condition was significant, *t*(29) = 2.46, *p* = .02, *d* = 0.4. Capture was largely reduced at the repeated location compared to the single location, despite in the latter the distractor rate was four times larger, while the number of color singletons appearing in the two locations was the same.

*Evidence of suppression: target processing impairment*

We then analysed the efficiency of target selection as a function of whether the

target appeared, in distractor-absent trials, in either the repeated or the single location.

An ANOVA on RTs revealed a main effect of target location, *F*(1.54, 44.55) = 8.43, *p* =

.002, 𝜂𝑝 2 = .22. Post-hoc tests showed that participants were slower when the target

appeared at the single location (*M* = 1221; *SD* = 95), compared to both the repeated (*M* =

1196; *SD* = 87), *t*(29) = -2.71, *p* = .03, *d* = -0.5, and the distractor-absent locations (*M* =

1193; *SD* = 81), *t*(29) = -4.61, *p* < .001 , *d* = -0.8. By contrast, RTs at the repeated location

where comparable to those in the distractor-absent locations, *t*(29) = -0.4, *p* = .6, *d* = -

0.07.

**Experiment 2**

*Attentional capture*

All RTs analyses were performed on correct trials (92% of total trials). After

outliers removal (3%), an ANOVA was performed on RTs with the factor Distractor

condition (absent, high probability or low probability), which was significant, *F*(1.35,

39.17) = 5.46, *p* = .01, 𝜂𝑝 2 = .15. Post-hoc comparisons showed that in the low-probability condition (*M* = 1193; *SD* = 75), participants were significantly slower than in both the high-probability condition (*M* = 1180; *SD* = 71), *t*(29) = 2.64, *p* = .04, *d* = 0.48, and the distractor-absent condition (*M* = 1178; *SD* = 72), *t*(29) = 2.39, *p* = .04, *d* = 0.43. The RT difference between the high-probability condition and distractor-absent condition was not significant, *t*(29) = 0.48, *p* = .6, *d* = 0.08.

*Evidence of suppression: target processing impairment*

We compared RTs, in distractor-absent trials, when the target appeared at the

high-probability distractor location, at the low-probability distractor location, or at the

remaining locations where the distractor never appeared. An ANOVA on RTs revealed a

main effect of target location, *F*(1.54, 44.71) = 8.14, *p* = .002 𝜂𝑝 2 = .2. Post-hoc tests

showed that participants were slower when the target appeared at the high-probability

location (*M* = 1200; *SD* = 70), compared to both the low-probability (*M* = 1179; *SD* = 76),

*t*(29) = -2.41, *p* = .04, *d* = 0.4, and the distractor-absent locations (*M* = 1173; *SD* = 75),

*t*(29) = -4.02, *p* = .001, *d* = 0.7. By contrast, RTs at the low-probability location were

comparable to those in the distractor-absent locations, *t*(29) = -1.18, *p* = .2, *d* = 0.2.

**Experiment 3**

*Attentional capture*

All RTs analyses were performed on correct trials (91% of total trials). After

outliers removal (3%), an ANOVA was performed on RTs with the factor distractor

condition (absent, repeated or single), which was significant, *F*(2, 58) = 37.49, *p* = < .001

𝜂𝑝 2 = .56. Post-hoc comparisons showed that in the single condition (*M* = 1273; *SD* =

105), participants were significantly slower than in the repeated condition (*M* = 1240;

*SD* = 92), *t*(29) = -6.22 , *p* = < .001, *d* = 1.1, and the distractor-absent condition (*M* =

1230; *SD* = 89), *t*(29) = 7.11, *p* < .001, *d* = 1.3. In the repeated condition they were also

slower than in the distractor-absent condition, *t*(29) = 2.55, *p* = .01, *d* = 0.4, although by

a smaller margin.

*Evidence of suppression: target processing impairment*

We compared RTs, in distractor-absent trials, when the target appeared at the

repeated distractor location, at the single distractor location, or in one of the remaining

locations where the distractor never appeared. An ANOVA on RTs revealed a main effect

of target location, *F*(1.54, 44.73) = 5.3, *p* = .01 𝜂𝑝 2 = .1. Post-hoc tests showed that

participants were slower when the target appeared at the single location (*M* = 1243; *SD*

= 103), compared to the distractor-absent locations (*M* = 1222; *SD* = 88), *t*(29) = 2.40, *p*

= .04, *d* = 0.4. They were also slower when it appeared at the repeated location (*M* =

1253; *SD* = 93), compared to the other distractor-absent locations, *t*(29) = 3.96, *p* = .001,

*d* = 0.7. RTs at the repeated location where comparable to those in the single location,

*t*(29) = 0.8, *p* = .4, *d* = 0.1.

**Experiment 4**

*Attentional capture*

All RTs analyses were performed on correct trials (93% of total trials). After

outliers removal (3%), an ANOVA was performed on RTs with the factor distractor

condition (absent, repeated, single high-probability, single low-probability), which was

significant, *F*(2.31, 66.87) = 44.59, *p* = <.001, 𝜂𝑝 2 = .6. Post-hoc comparisons showed that

participants were slower in the single low-probability condition (*M* = 1288; *SD* = 96.4),

compared to the single high-probability condition (*M* = 1236; *SD* = 91.2), *t*(29) = 6.75, *p*

< .001, *d* = 1.2, to the repeated condition (*M* = 1218; *SD* = 93.6), *t*(29) = 6.78, *p* < .001, *d* =

1.2, and to the distractor-absent condition (*M* = 1199; *SD* = 84.6), *t*(29) = 10.6, *p* < .001,

*d* = 1.9. In the single high-probability condition participants were slower than in the

distractor-absent condition, *t*(29) = 7.45, *p* < .001, *d* = 1.3, while RTs were very close to

being significantly slower compared to the repeated condition, *t*(29) = 1.9, *p* = .05, *d* =

0.3. In the repeated condition participants were also slower than in the distractor-absent condition, *t*(29) = 2.5, *p* = .03, *d* = 0.4, although by a small margin.

The difference between the repeated and single high-probability conditions was very

close to being significant, *t*(29) = -1.98, *p* = .05, *d* = 0.3.

*Evidence of suppression: target processing impairment*

We compared RTs, in distractor-absent trials, when the target appeared at the

repeated location, at the single high- and low-probability location, or in the remaining

locations where distractors never appeared. An ANOVA on RTs revealed a main effect of

target location, *F*(2.4, 69.66) = 8.3, *p* < .001, 𝜂𝑝 2 = .2. Post-hoc tests showed that

participants were slower when the target appeared at the single high-probability

location (*M* = 1238; *SD* = 86), compared to the distractor-absent locations (*M* = 1211; *SD*

= 88), *t*(29) = 4.06, *p* < .001, *d* = 0.7, to the repeated location (*M* = 1210; *SD* = 98), *t*(29) =

3.31, *p* = .003, *d* = 0.6, and to the single low-probability location (*M* = 1203; *SD* = 87),

respectively *t*(29) = 5.2, *p* < .001, *d* = 0.9. The differences between RTs in the repeated condition and single low-probability condition was not significant, *t*(29) = .6, *p* = .7, *d* = 0.1. RTs at the distractor-absent locations and single low-probability location were also not significantly different *t*(29) = .1, *p* = .3, *d* = 0.2, as well as those at the distractor-absent locations and the repeated location *t*(29) = 1.63, *p* = .3, *d* = 0.1.
